# 1 Automated stenosis estimation of coronary angiographies 2 using end-to-end learning

3 Christian Kim Eschen, MSc<sup>1</sup>, Karina Banasik, PhD<sup>1</sup>, Anders Bjorholm Dahl, PhD<sup>2</sup>, Piotr  
4 Jaroslaw Chmura, MSc<sup>1</sup>, Peter Bruun-Rasmussen, PhD<sup>3</sup>, Frants Pedersen, MD, PhD<sup>4,5</sup>, Lars  
5 Køber, MD, PhD<sup>5,6</sup>, Thomas Engstrøm, MD, PhD<sup>4,5</sup>, Morten Bøttcher MD PhD<sup>7,8</sup>, Simon  
6 Winther, MD PhD<sup>7,8</sup>, Alex Hørby Christensen, MD, PhD<sup>4,5,6</sup>, Henning Bundgaard, MD, PhD<sup>4,5</sup>,  
7 and Søren Brunak, PhD<sup>1\*</sup>

8 <sup>1</sup>Novo Nordisk Foundation Center for Protein Research, Faculty of Health and Medical  
9 Sciences, University of Copenhagen, Copenhagen, Denmark; <sup>2</sup>Section for Visual Computing,  
10 Department of Applied Mathematics and Computer Science, Technical University of  
11 Denmark, Lyngby, Denmark; <sup>3</sup>Rigshospitalet, Department of Clinical Immunology, Denmark;  
12 <sup>4</sup>Rigshospitalet, The Heart Center, Department of Cardiology, Faculty of Health and Medical  
13 Sciences, University of Copenhagen, Copenhagen, Denmark; <sup>5</sup>Department of Clinical  
14 Medicine, Faculty of Health and Medical Sciences, University of Copenhagen, Copenhagen,  
15 Denmark; <sup>6</sup>Department of Cardiology, Faculty of Health and Medical Sciences, University of  
16 Copenhagen, Herlev-Gentofte Hospital, <sup>7</sup> Department of Cardiology, Gødstrup Hospital,  
17 Herning, <sup>8</sup> Institute of Clinical Medicine, Aarhus University, Aarhus Denmark

18 **Keywords:** Coronary angiography, coronary artery disease, ischemic heart disease, deep  
19 learning, quantitative coronary angiography, imaging.

20 \*Corresponding author: Søren Brunak, [soren.brunak@cpr.ku.dk](mailto:soren.brunak@cpr.ku.dk)

NOTE: This preprint reports new research that has not been certified by peer review and should not be used to guide clinical practice.

21 **Abstract**

22 **Background**

23 The initial evaluation of coronary stenosis during coronary angiography is typically  
24 performed by visual assessment. The visual assessment of coronary angiographies has  
25 limited accuracy compared to quantitative methods like fractional flow reserve and  
26 quantitative coronary angiography. Quantitative methods are also more time-consuming  
27 and costly.

28 **Objectives**

29 To test whether applying deep-learning-based image analysis to coronary angiographies  
30 might yield a faster and more accurate stenosis estimation than visual assessment.

31 **Methods**

32 We developed deep learning models for predicting coronary artery stenosis using 332,582  
33 multi-frame x-ray images (cine loops) from 19,414 patients undergoing coronary  
34 angiography. The curated dataset for model development included 13,840 patients, with  
35 62,165 cine loops of the left coronary artery and 31,161 cine loops of the right coronary  
36 artery.

37 **Results**

38 For identification of significant coronary stenosis (visual assessment of diameter stenosis  
39 >70%), our model obtained a receiver operator characteristic (ROC) area under the curve  
40 (ROC-AUC) of 0.903 (95% CI: 0.900-0.906) on the internal test set with 5,056 patients. The  
41 performance was evaluated on an external test set with 608 patients against visual  
42 assessment, 3D quantitative coronary angiography, and fractional flow reserve ( $\leq 0.80$ ),

43 obtaining ROC AUC values of 0.833 (95% CI: 0.814-0.852), 0.798 (95% CI: 0.741-0.842, and  
44 0.780 (95% CI: 0.743-0.817), respectively.

#### 45 **Conclusion**

46 For assessment of coronary stenosis during invasive coronary angiography a deep-learning-  
47 based model showed promising results for predicting visual assessment (ROC AUC of 0.903).  
48 Compared to previous work, our approach demonstrates performance increase, includes all  
49 16 segments, does not exclude revascularized patients, is externally tested, and is simpler  
50 using fewer steps and fewer models.

## 51 Introduction

52 X-ray multi-frame images (also known as cine loops, videos, views, or projections) acquired  
53 during an invasive coronary angiography (CAG) yield detailed information about the  
54 anatomy and flow in the coronary arteries.<sup>1</sup> Cine loops are acquired separately for the left  
55 coronary artery (LCA) and right coronary artery (RCA), and views are acquired from different  
56 angulations. During and after recordings, coronary angiographies (CAGs) are visually  
57 assessed to identify and quantify stenosis on all 16 coronary artery segments<sup>2</sup>. This visual  
58 assessment, often called "eyeballing", involves assessing the diameter reduction of the  
59 artery segment compared to the proximal reference in percentage. Based on the presence  
60 of stenoses, the need for pharmacotherapy and revascularization can be considered.<sup>2</sup>  
61 The visual assessment of a stenosis has a high observer variance<sup>2,3</sup>. Recent guidelines  
62 suggest unnecessary use of percutaneous coronary intervention (PCI) and coronary artery  
63 bypass grafting (CABG) in 1-2% and 10-15% of cases, respectively, which is likely caused by  
64 inaccurate assessment of stenoses.<sup>2-3</sup>

65 Objective stenosis assessment can be evaluated by fractional flow reserve (FFR)  
66 measurements during the procedure, measuring the pressure drop across a stenosis to  
67 determine the hemodynamic significance of a stenosis. Despite the proven benefits of wire-  
68 based FFR measurements<sup>4-9</sup>, utilization varies across hospitals and countries, with a  
69 utilization span between 5-17%.<sup>10-13</sup>

70 Alternatively, quantitative coronary angiography (QCA) can be used for objective  
71 measurements of a vessel diameter reduction using image analysis software. QCA relies  
72 typically on keyframe extraction, manual segmentation of vessels with stenosis, followed by  
73 3D reconstruction using two different angulations.<sup>14-15</sup> While FFR is considered the ground  
74 truth for determining hemodynamically significant stenosis, QCA is attractive for research as

75 it can be performed offline and after the CAG.<sup>14</sup> It has been shown that revascularization of  
76 non-culprit lesions based on QCA can reduce future incidences of myocardial infarction.<sup>15</sup>  
77 Unfortunately, both QCA and FFR are expensive, time-consuming, and require special  
78 training to produce reliable results.

79 Considering these challenges, there has been growing interest in applying deep-learning-  
80 based methodologies for automatic stenosis estimation.<sup>16-23</sup> Previous, similar work involving  
81 reasonably sized datasets presents a complex pipeline having six steps and eight models,  
82 focusing only on 11 segments, and excludes patients with prior revascularization.<sup>22-23</sup>

83 In this paper, we present an end-to-end learning-based approach aiming to provide a useful  
84 clinical tool. Our method has improved performance compared to related work, capable of  
85 estimating stenosis on all 16 segments without exclusion of patients with prior  
86 revascularization, and the performance was evaluated on an external test set from a  
87 different hospital. Furthermore, the performance was evaluated against both visual  
88 assessments, QCA, and FFR.

## 89 **Methods**

### 90 Cohort description

91 Rigshospitalet dataset: Cohort description

92 Our dataset used for model development and testing included 19,414 patients, comprising  
93 332,582 X-ray cine loops, were extracted from Rigshospitalet, Copenhagen, (period 2006-  
94 2016). In total, the dataset contained 23,415 CAGs, and each CAG contained an average of  
95 17.8 cine loops. The characteristics of the 19,414 patients, corresponding to the time point  
96 of coronary angiography, are presented in Table 1. CAGs were recorded using Philips  
97 Medical Systems, GE HealthCare, and Siemens Healthineers angio systems. The CAGs were  
98 linked to the Eastern Denmark Heart Registry (EDHR) database. The EDHR database contains  
99 information about visual assessment in each of the three major coronary arteries, reported  
100 according to the 16-segment classification protocol.<sup>25-27</sup> Additionally, the indication for  
101 coronary angiography and the treatment was recorded (Supplemental Table S1). Segments  
102 displaying borderline or intermediate stenosis were, if appropriate, further evaluated using  
103 Fractional Flow Reserve (FFR). Every entry in the EDHR database was manually registered by  
104 interventional cardiologists as part of clinical practice. We used 14,358 randomly selected  
105 patients for model development (90% for the training set with 12,846 patients and 10% for  
106 the validation set with 1,389 patients). For evaluation of the model performance, we used  
107 5,056 randomly selected patients for evaluating the performance, which we will refer to as  
108 the internal test set (Supplemental Table S2).

109 Table 1 Cohort characteristics.

| Features                    | Total          |
|-----------------------------|----------------|
| Patients                    | 19,414         |
| Age, years                  | 67.3 ± 12.4    |
| Males (%)                   | 13,377 (68.9%) |
| Diabetes (%)                | 3,634 (18.7%)  |
| Hypertension (%)            | 10,042 (51.7%) |
| Smokers and ex-smokers (%)  | 12,752 (65.7%) |
| No vessel abnormalities (%) | 2,892 (14.9%)  |
| Atheromatous vessels (%)    | 4,886 (25.2%)  |
| 1 vessel disease (%)        | 7,030 (36.2%)  |
| 2 vessel disease (%)        | 3,477 (17.9%)  |
| 3 vessel disease (%)        | 3,209 (16.5%)  |
| Left main disease (%)       | 1094 (5.64%)   |
| Prior PCI (%)               | 4,124 (21.2%)  |
| Prior CABG (%)              | 1,506 (7.7%)   |
| Right dominant (%)          | 15,795 (81.4%) |
| Left dominant (%)           | 1,811 (9.3%)   |
| Co dominant (%)             | 2,023 (10.4%)  |
| Arrhythmia device (%)       | 827 (4.3%)     |

110

111

112

113

114

115 Skejby Hospital: Cohort for external testing

116 We further evaluated the model on 608 patients from Skejby Hospital in the Central

117 Denmark Region, which we refer to as the external test set. These patients were selected

118 following initial findings of suspicious stenosis from coronary computed tomography

119 angiography (CTA). Each patient had a single coronary angiography recorded using Philips

120 Medical Systems and Siemens Healthineers Angio System scanners. FFR was measured in all

121 segments technically feasible for FFR measurements. All applicable segments were also

122 analyzed with QCA using Medis QAngio<sup>®</sup>XA 3D, Netherlands.

123



124 Overview: A deep learning-based approach for automated stenosis estimation

125 We employed a multi-stage approach for estimating the degree of stenosis on all coronary  
126 artery segments. First, we manually annotated a subset of cine loops as either left or right  
127 coronary arteries (LCA/RCA). Secondly, we developed and trained a deep learning model to  
128 differentiate between LCA and RCA in coronary angiography cine loops. This model was  
129 used to classify all cine loops as LCA, RCA, or "other". Thirdly, we selected all cine loops  
130 before revascularization using an automated approach based on the classified cine loops  
131 and the timestamp. Fourthly, we developed two deep learning models for estimating  
132 stenosis: one for LCA and another for RCA, utilizing the cine loops before revascularization.  
133 An overview of the approach can be found in the Central Illustration.

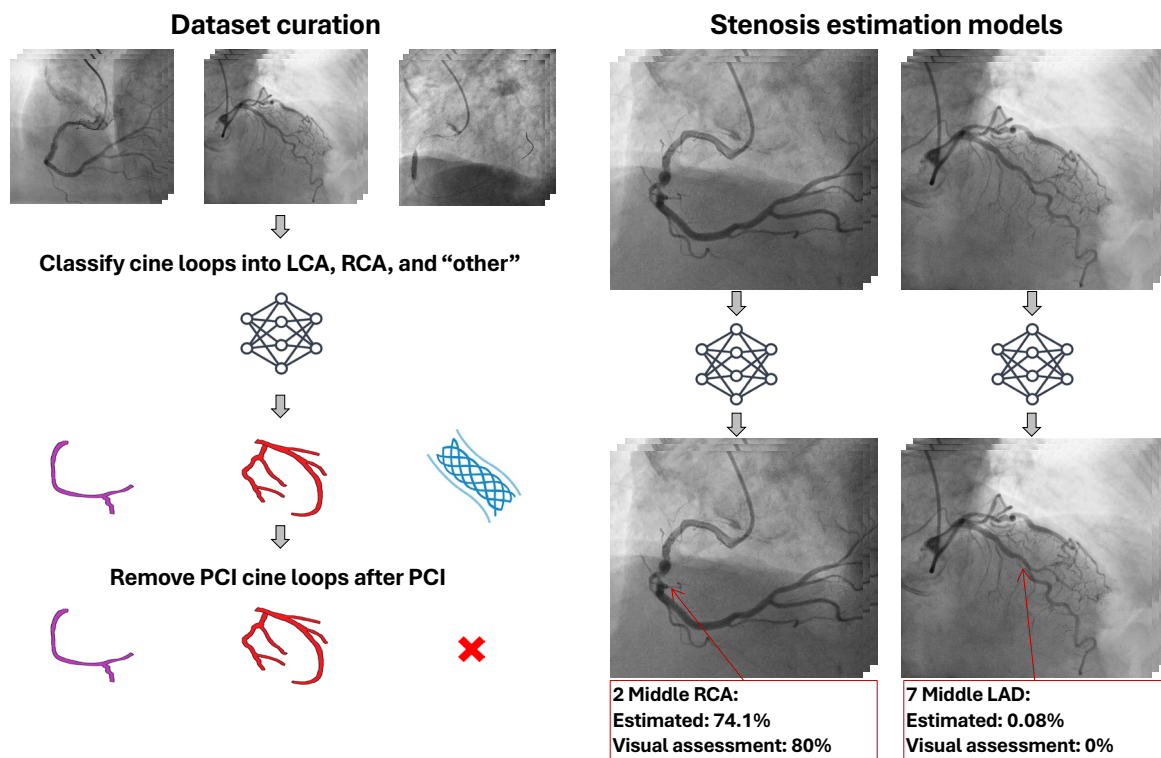

134

135 Central Illustration. Overview of the proposed approach for stenosis estimation.

136

### 137 R2D+1 backbone deep learning model

138 We used the R2D+1 deep learning model,<sup>29</sup> a supervised 3D convolutional neural network  
139 (CNN), which has previously been demonstrated state-of-the-art performance for CAG cine  
140 loops classification of right and left coronary artery.<sup>28</sup> The R2D+1 model uses the R2D+1  
141 block, which compresses the 3D convolutional block into a spatial block with filters of size 3  
142  $\times 3 \times 1$  and a temporal block with filters of size  $1 \times 1 \times 3$ . Non-linear ReLu activation is used  
143 between the spatial and temporal filters. The R2D+1 block can be interpreted as a  
144 combination of spatial and temporal filters, but with non-linearity between the two  
145 operations, extracting non-linear relations between spatial and temporal features.

146 For both CAG cine loop classification tasks and stenosis estimation, we employed the R2D+1  
147 network. The model takes a CAG cine loop as input from the training set and learns  
148 discriminative features. The discriminatory features will depend on the target used for the  
149 model, and thus, the model learns different features for the cine loop classification model  
150 and stenosis estimation models.

### 151 Annotation of cine loops

152 To categorize all the cine loops, we manually labelled a subset of 18,058 cine loops from  
153 1,228 patients as LCA, RCA and "other". The "other" category included cine loops, in which  
154 the LCA or the RCA was not present. The purpose of the "other" category was to exclude  
155 cine loops not relevant for visual assessment. We specifically categorized cine loops  
156 containing guide wires as "other", even when they also displayed either the left or the right  
157 coronary artery. Cine loops containing chronic total occlusions (CTO) were still annotated as  
158 LCA or RCA. For training and validation, we used 1,047 patients with 15,068 cine loops. For

159 model evaluation, we used a test dataset of 2,990 cine loops from 179 patients

160 (Supplemental Table S2).

### 161 Cine loop classification model

162 We developed a deep learning classification model designed to classify cine loops into one  
163 of the three categories: LCA, RCA and "other" using the labeled subset. We used the trained  
164 cine loop classification model to categorize the cine loops in the training/validation and the  
165 test sets as LCA (LAD and LCX), RCA and "other". This classification step extends the work of  
166 Eschen et al.<sup>28</sup>, who focused on left and right coronary artery classification, by incorporating  
167 an additional "other" category.

### 168 Diagnostic cine loop selection

169 The cine loops obtained during, and post revascularization are not applicable to the  
170 decision-making process regarding revascularization in a deployment scenario of the  
171 models. Additionally, cine loops obtained during, and post revascularization are highly  
172 associated with stenoses and may, therefore, introduce bias in the model during training.  
173 Consequently, we excluded cine loops performed during and post revascularization  
174 procedures. This exclusion involved removing cine loops categorized as "other" and any cine  
175 loops obtained after this category appeared in the sequence. We denote this step as the  
176 "diagnostic cine loop selection step" as depicted in the Central Illustration (see also  
177 Supplemental Methods 1). A detailed explanation of the data inclusion process is presented  
178 in Supplemental Materials Section 1.1, and Figure S1.

### 179 Training the stenosis estimation models

180 Using the diagnostic cine loop selection procedure, we included cine loops of LCA and RCA  
181 and excluded cine loops obtained during and after PCI. The selection procedure resulted in  
182 13,284 patients with 31,161 RCA cine loops, and 13,768 patients with 62,165 LCA cine loops  
183 (see Supplemental Materials Table S3, and Figure S2-S3 for details).

184 We developed the stenosis estimation models individually for RCA and LCA using 31,161 and  
185 62,165 cine loops. For both models, we used multi-output regression models. For the RCA  
186 stenosis estimation model, the final linear layer contained five neurons, one for each of the  
187 five RCA segments. Specifically, for the RCA model, the five output neurons corresponded to  
188 artery segments relevant to the RCA. Similarly, for the LCA stenosis estimation model, we  
189 used a multi-output regression model with 13 neurons in the final linear layer, one for each  
190 of the 13 segments relevant to the LCA (we also include the Posterior Descending Artery  
191 (PDA) and the Posterior Left Ventricular Artery (PLA) in the LCA model). This design ensures  
192 that the model can simultaneously make stenosis estimates for each segment, making it  
193 capable of handling multiple stenoses at once.

194 As the visual stenosis assessment was only reported for segments with potentially  
195 significant stenoses, we replaced the missing values with zeros as these were missing by  
196 purpose. Therefore, we had a complete dataset that included cine loops and corresponding  
197 visual assessment of stenosis on all coronary artery segments.

#### 198 Evaluating stenosis estimation models against visual assessment

199 Using the diagnostic cine loop selection procedure, we established a test set with 5,056  
200 patients (24,359 cine loops of the LCA from 5,015 patients and 12,138 cine loops of the RCA  
201 from 4,788 patients, as shown in Supplemental Figure S4). Additionally, we leveraged the  
202 external cohort with 608 patients for external validation (2,949 cine loops of LCA from 608

203 patients and 1,425 cine loops of RCA from 599 patients as depicted in Supplemental Figure  
204 S5).

205 The final LCA and RCA stenosis estimates were obtained by selecting the most severe  
206 stenosis estimate (the maximum stenosis) from all cine loops in a CAG examination.  
207 Coronary dominance was used to decide whether LCA or RCA predictions should be  
208 employed to evaluate the PDA and PLA segments.

209 We evaluated the model's ability to predict diameter stenosis as a continuous outcome. We  
210 also assessed its ability to distinguish between significant and non-significant stenosis as a  
211 binary outcome. We applied the clinical threshold for significant coronary artery diameter  
212 stenosis >70%, except for the left main segment, which was >50%.<sup>27</sup> We assessed the  
213 performance of the stenosis predictions for each of the 16 segments of the LCA and RCA  
214 models, as well as the overall average performance.

215 We also evaluated the stenosis estimation model using our "Angin-FFR Subset". The "Angina  
216 FFR Subset" was part of the internal test set, but consists of patients with similar  
217 characteristics as the patients in the external test set. Hence, this subset included 499  
218 patients with indications of ischemia and angina, patients with FFR measurements in at least  
219 one segment, patients with atheromatous lesions, and those with single-vessel and two-  
220 vessel disease.

### 221 Evaluating stenosis estimation models against FFR

222 For the subset of angiographies followed by FFR measurements (1180 patients in the  
223 internal test set and 439 patients in the external test set), we compared the stenosis  
224 estimates against FFR measurements. The FFR measurements were transformed to a  
225 comparable scale by subtracting the FFR measurements from one. We evaluated the

226 performance on detecting hemodynamic significant stenosis ( $FFR \leq 0.8$ ). To establish a  
227 comparable baseline for predicting  $FFR \leq 0.8$ , we evaluated the performance using visual  
228 assessments as predictors.

### 229 Evaluating stenosis estimation models against QCA

230 The estimated stenosis was also compared against QCA in the external test set for 359  
231 patients. The evaluation was performed similarly to the evaluation against visual  
232 assessment. As we had access to both the visual assessments and FFR in this dataset for 209  
233 of the patients, we established a baseline for comparison using visual assessment and FFR  
234 as predictors for QCA.

### 235 Statistical analysis

236 The estimated stenosis was compared against visual assessment, FFR, and QCA  
237 measurements using mean absolute error (MAE) and Pearson's correlation coefficient ( $r$ ).

238 The estimated stenoses were also compared against FFR using these metrics.

239 To evaluate the performance on detecting significant stenoses, we used the area under the  
240 Receiver Operating Characteristic curve (ROC AUC), the area under the precision-recall  
241 curve (PR AUC), F1 score, precision, sensitivity, and specificity. The confidence intervals  
242 were computed using 1000 bootstrap samples at a 95% confidence level.

### 243 Approvals and data availability

244 Approval for data access was granted by the National Committee on Health Research Ethics  
245 (1708829 "Genetics of cardiovascular disease", ID P-2019-93), The Danish Data Protection  
246 Agency (ref: 514-0255/18-3000, 514-0254/18-3000, SUND-2016-50), and by the Danish  
247 Patient Safety Authority (3-3013-1731-1, appendix 31-1522-23). All personal identifiers were

248 pseudo-anonymized. Data access applications can be made to the Danish Health Data  
249 Authority (contact: [servicedesk@sundhedsdata.dk](mailto:servicedesk@sundhedsdata.dk)). Anyone wanting access to the data and  
250 to use them for research will be required to meet research credentialing requirements as  
251 outlined at the authority's web site:  
252 [https://sundhedsdatastyrelsen.dk/da/english/health\\_data\\_and\\_registers/research\\_services](https://sundhedsdatastyrelsen.dk/da/english/health_data_and_registers/research_services)  
253 . Requests are normally processed within 3 to 6 months.  
254 The source code for this study is available (URL to come).

## 255 **Results**

### 256 Performance of the cine loop classification model

257 The performance of the cine loop classification model had a macro F1 score of 0.972 (95%  
258 CI: 0.972-0.972) on the internal test set (Figure S5 in Supplemental Materials). We assessed  
259 the discordant predictions (79 cine loops) and found that most of these originated from  
260 cases with ambiguous labels (e.g., cine loops obtained while measuring the FFR using a  
261 guide wire).

### 262 Performance of the stenosis estimation model

263 For predicting the visual assessment (diameter stenosis), we obtained a MAE of 0.178 (95%  
264 CI 0.177-0.179), and a Pearson's correlation coefficient of 0.661 (95% CI 0.656-0.666) on the  
265 internal test set. On the "Angina-FFR Subset" we obtained an MAE of 0.156 (95% CI: 0.144-  
266 0.168), Pearson's correlation coefficient of 0.293 (95% CI: 0.196-0.393) when predicting  
267 visual assessment. On the external test set, we obtained an MAE of 0.186 (95% CI: 0.182-  
268 0.190) and a Pearson's correlation coefficient of 0.386 (95% CI: 0.317-0.373) compared to  
269 the visual assessment.

270 We evaluated the model's performance on significant stenosis identification and obtained a  
271 ROC AUC of 0.903 (95% CI: 0.900-0.906), and PR AUC of 0.693 (95% CI: 0.685-0.701), as seen  
272 in Figure 1. On the "Angina-FFR Subset" we obtained a ROC AUC of 0.849 (95% CI: 0.829-  
273 0.867), PR AUC of 0.486 (95% CI: 0.436-0.530) when predicting significant stenoses.  
274 For detection of significant stenosis on the external test set, the ROC AUC decreased to  
275 0.833 (95% CI: 0.814-0.852), and PR AUC decreased to 0.219 (95% CI: 0.190-0.250) as shown  
276 in Table 2 (the performances on the individual segments are depicted in Supplemental  
277 Materials Table S5-S6).

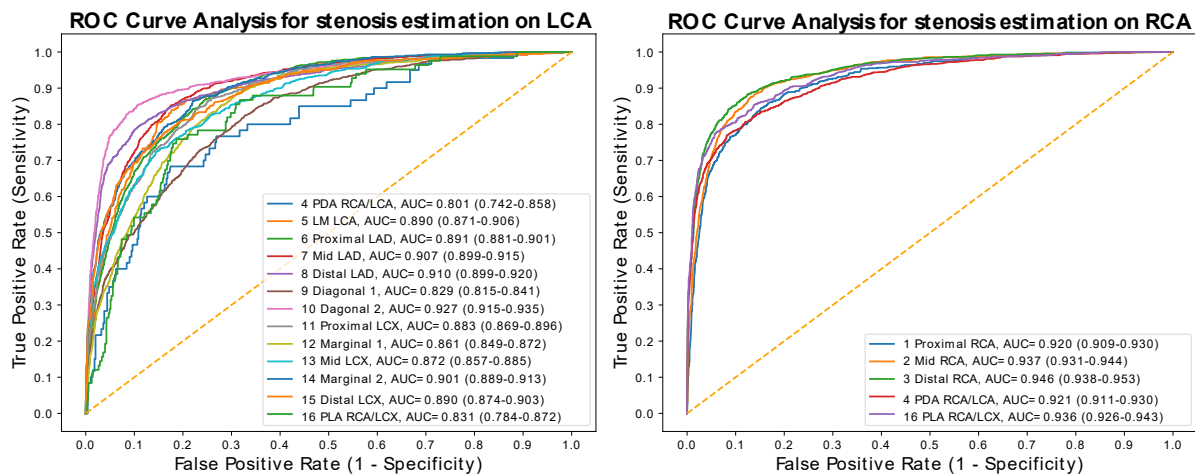

278  
279 Figure 1. ROC curve for significant stenosis detection for each segment on the internal test  
280 set (visual assessment of diameter stenosis >70%).

281



282 Table 2 Performance on predicting visual assessment

|             | Internal test set         | External test set         |
|-------------|---------------------------|---------------------------|
| Method      | Estimated stenosis (ours) | Estimated stenosis (ours) |
| MAE         | 0.178 (0.177-0.179)       | 0.186 (0.182-0.190)       |
| r           | 0.661 (0.656-0.666)       | 0.345 (0.317-0.373)       |
| ROC AUC     | 0.903 (0.900-0.906)       | 0.833 (0.814-0.852)       |
| PR AUC      | 0.693 (0.685-0.701)       | 0.219 (0.190-0.250)       |
| F1          | 0.637 (0.631-0.643)       | 0.314 (0.284-0.343)       |
| Sensitivity | 0.681 (0.674-0.689)       | 0.548 (0.503-0.593)       |
| Specificity | 0.922 (0.920-0.924)       | 0.901 (0.895-0.907)       |
| Precision   | 0.599 (0.591-0.606)       | 0.220 (0.199 -0.245)      |

283 Predicting fractional flow reserve

284 For predicting the measured FFR values on the internal test set, we obtained an MAE of  
285 0.157 (95% CI 0.148-0.165) and a Pearson's correlation coefficient of 0.220 (95%CI 0.163-  
286 0.281). On the external test set, we obtained an MAE of 0.120 (0.111-0.129) and a Pearson's  
287 correlation coefficient of 0.441 (95% CI 0.375-0.502) when predicting the measured FFR  
288 values.

289 For the detection of hemodynamically significant stenosis ( $FFR \leq 0.80$ ), we obtained a ROC  
290 AUC of 0.651 (95% CI: 0.616-0.686) on the internal test set, and a ROC AUC of 0.780 (95% CI:  
291 0.743-0.817) on the external test set as shown in Table 3 (performance on individual  
292 segments are depicted in Tables S7-S10 in Supplemental Materials).

293

294 Table 3 Performance on predicting FFR

| Method      | Internal test set                  |                          | External test set                  |                         |                         |
|-------------|------------------------------------|--------------------------|------------------------------------|-------------------------|-------------------------|
|             | Estimated stenosis<br>(this paper) | Visual<br>assessment     | Estimated stenosis<br>(this paper) | Visual<br>assessment    | QCA                     |
| MAE         | 0.157 (0.148-0.165)                | 0.394 (0.385-<br>0.401)  | 0.120 (0.111-0.129)                | 0.254 (0.240-<br>0.268) | 0.265 (0.248-<br>0.285) |
| r           | 0.220 (0.163-0.281)                | 0.549 (0.494-<br>0.598)  | 0.441 (0.375-0.502)                | 0.640 (0.600-<br>0.676) | 0.180 (0.037-<br>0.325) |
| ROC AUC     | 0.651 (0.616-0.686)                | 0.853 (0.828-<br>0.876)  | 0.780 (0.743-0.817)                | 0.844 (0.817-<br>0.877) | 0.575 (0.491-<br>0.663) |
| PR AUC      | 0.400 (0.353-0.452)                | 0.635 (0.583-<br>0.685)  | 0.441 (0.365-0.524)                | 0.532 (0.449-<br>0.606) | 0.430 (0.318-<br>0.552) |
| F1          | 0.417 (0.368-0.465)                | 0.680 (0.636-<br>0.723)  | 0.438 (0.361-0.511)                | 0.558 (0.497-<br>0.621) | 0.058 (0.000-<br>0.143) |
| Sensitivity | 0.411 (0.360-0.465)                | 0.690 (0.638-<br>0.742)  | 0.386 (0.311-0.464)                | 0.611 (0.526-<br>0.689) | 0.030 (0.000-<br>0.077) |
| Specificity | 0.786 (0.761-0.814)                | 0.869 (0.847-<br>0.892)  | 0.914 (0.891-0.936)                | 0.868 (0.842-<br>0.894) | 0.985 (0.962-<br>1.000) |
| Precision   | 0.427 (0.372-0.480)                | 0.670 (0.619-<br>0.716)) | 0.510 (0.423-0.594)                | 0.519 (0.445-<br>0.590) | 0.488 (0.000-<br>1.000) |

295

296

297 Predicting QCA

298 We further evaluated the performance on QCA prediction on the external test set (QCA was  
299 not measured in the dataset from Rigshospitalet). We obtained a MAE of 0.210 (95% CI  
300 0.203-0.217) and a Pearson's correlation coefficient of 0.477 (95% CI 0.423-0.530). On  
301 detection QCA diameter stenosis >70%, we obtained a ROC AUC of 0.798 (95% CI: 0.782-  
302 0.814), as depicted in Table 4. On detecting QCA-based significant stenosis, our models were  
303 consistently better than visual assessment and FFR with a ROC AUC of 0.798 versus 0.658  
304 and 0.575 (additional performance metrics on individual segments are depicted in Table  
305 S11-S12 in Supplemental Materials).

306 Table 4 Performance for predicting QCA on the external test set

| Method      | Estimated stenosis (this paper) | Visual assessment   | FFR                 |
|-------------|---------------------------------|---------------------|---------------------|
| MAE         | 0.210 (0.203-0.217)             | 0.351 (0.343-0.360) | 0.265 (0.248-0.285) |
| r           | 0.477 (0.423-0.530)             | 0.358 (0.302-0.408) | 0.180 (0.037-0.325) |
| ROC AUC     | 0.798 (0.741-0.842)             | 0.658 (0.591-0.726) | 0.575 (0.491-0.663) |
| PR AUC      | 0.340 (0.243-0.443)             | 0.273 (0.179-0.374) | 0.430 (0.318-0.552) |
| F1          | 0.246 (0.188-0.304)             | 0.246 (0.183-0.312) | 0.058 (0.000-0.143) |
| Sensitivity | 0.578 (0.471-0.688)             | 0.446 (0.340-0.563) | 0.030 (0.000-0.077) |
| Specificity | 0.817 (0.797-0.836)             | 0.872 (0.853-0.889) | 0.985 (0.962-1.000) |
| Precision   | 0.157 (0.116-0.198)             | 0.170 (0.123-0.225) | 0.488 (0.000-1.000) |

## 307 Discussion

308 Our deep learning model demonstrated robust performance in classifying cine loops into  
309 LCA, RCA, and "other" categories, with a macro F1 score of 0.972. For detecting significant  
310 stenosis, high ROC AUC levels of 0.903 on the internal test set and of 0.833 on the external  
311 test set were found. The model outperformed visual assessment when validated against  
312 QCA, achieving a ROC AUC of 0.798. For predicting hemodynamically significant stenosis  
313 measured by FFR, the model achieved a ROC AUC of 0.651 on the internal test set and 0.780  
314 on the external test set. Here, we discuss our findings regarding the related works, visual  
315 assessments, FFR, and QCA, and finally, we address the limitations of our approach.

### 316 Related works

317 In recent years, several studies have focused on the significant stenosis detection in  
318 coronary angiography (CAG) cine loops. As mentioned, although many of these  
319 advancements have been based on small datasets only considering single CAG frames<sup>16-18</sup>,  
320 efforts for significant stenosis detection on larger datasets exist<sup>19-23</sup>. For instance, Avram et  
321 al. curated and trained a model (CathAI) including 11,972 patients, achieving a ROC AUC of  
322 0.839 on an internal test set.<sup>19</sup> Most recently, and comparable to our work, Langlais et al.  
323 introduced DeepCoro, developed by the same research group behind CathAI. DeepCoro is a  
324 6-step pipeline that includes primary structure identification, stenosis detection, frame  
325 registration, coronary artery segmentation, alignment of stenosis with segments, and finally,  
326 stenosis regression.<sup>23</sup> DeepCoro was developed using 182,418 coronary angiography cine  
327 loops, and it obtained a ROC AUC of 0.829 on stenosis detection, and a MAE of 20.15% on  
328 predicting visual assessment in percentage on an internal test set.

329 Compared to our results, DeepCoro achieved a test ROC AUC of 0.8294 (0.8215–0.8373) and  
330 a PR AUC of 0.5239 (0.5041–0.5421), which is significantly lower than our test performances  
331 of ROC AUC of 0.903 (0.900-0.906) and a PR AUC of 0.693 (0.685-0.685). Notably, our  
332 approach involves 2 steps and 3 models, while DeepCoro uses 6 steps and 8 models.<sup>23</sup>  
333 Notably, the most similar work, i.e., DeepCoro only focused on 11 Segments, instead of 16  
334 segments and excluded patients with prior CABG and PCI.<sup>23</sup> Both aspects are highly relevant  
335 for assessing a CAG.<sup>2</sup> Moreover, previous work did not evaluate the performance on both  
336 QCA, FFR, nor was the performance assessed on an external test set from another cohort  
337 and hospital. Finally, our methods can run on the fly with a processing speed of 0.03  
338 seconds for a cine loop which is significantly better than DeepCoro with a processing speed  
339 of 62.6 seconds.  
340 Hence, we aimed to address the limitations in existing work, and our models obtain superior  
341 performance, and the approach uses a simpler and faster pipeline.

#### 342 Comparison against visual assessment

343 While we obtained the best performance reported in the literature for significant stenosis  
344 detection (ROC AUC of 0.903 and PR AUC of 0.693), we observed a notable performance  
345 drop on the external test set (ROC AUC of 0.833 and PR AUC of 0.219). A similar pattern  
346 emerged when evaluating the model on the "Angina-FFR Subset," where the ROC AUC  
347 decreased to 0.849 and the PR AUC to 0.486. The most significant factor contributing to this  
348 performance decline appears to be the difference in patient characteristics. The external  
349 test set consisted of patients selected based on prescreening with CTA, leading to a higher  
350 proportion of individuals with intermediate stenosis and excluding those with mild stenosis  
351 or multivessel disease, such as patients with STEMI or NSTEMI.

352

353 Comparison against FFR

354 For predicting hemodynamically significant stenoses, our model achieved a ROC AUC of  
355 0.651 (95% CI: 0.616-0.686) on the internal test set and 0.780 (95% CI: 0.743-0.817) on the  
356 external test set. The performance of the model was inferior on predicting hemodynamical  
357 significant stenosis using visual assessment achieving a ROC AUC of 0.853 and 0.844 on the  
358 test set and the external test set. However, the reported visual assessments can be  
359 overoptimistic and biased towards FFR measurements, as they are typically reported after  
360 the FFR is measured and are not blinded to the FFR measurement. Another notable finding  
361 is that using QCA to determine hemodynamically significant stenosis from FFR yielded low  
362 performance. While our models demonstrated good performance, there is still room for  
363 improvement for predicting hemodynamically significant stenosis.

364 Comparison against QCA

365 For detecting the clinically important threshold of QCA diameter stenosis >70% on the  
366 external test set, our model achieved a ROC AUC of 0.798 (95% CI: 0.782-0.814). This  
367 performance was consistently better than visual assessment, which obtained a ROC AUC of  
368 0.658 (95% CI: 0.591-0.726), and FFR, which obtained a ROC AUC of 0.575 (95% CI: 0.491-  
369 0.552). While there is strong evidence that FFR is optimal for revascularization decisions,  
370 QCA is attractive for research. Our methodology has the potential to be used as a fast and  
371 accurate alternative to traditional QCA.

372 Limitations



373

374 Despite the promising results, we acknowledge some limitations in our results. The most  
375 notable limitation is that the stenosis estimation models were trained on patients  
376 undergoing routine coronary angiography, including patients without disease and those  
377 with multivessel disease. As a result, the stenosis estimation models are not guaranteed to  
378 generalize to patient cohorts with other inclusion/exclusion criteria (e.g., patients  
379 undergoing CTA before coronary angiography), which can be seen in the decreased  
380 performance on predicting visual assessment in the external test set and the subset  
381 "Angina-FFR Subset". Secondly, the stenosis estimation models were trained using visual  
382 assessments, as we did not have access to QCA, and FFR measurements which were only  
383 available for borderline stenosis segments and where it was technically feasible to perform  
384 the measurements.

### 385 **Conclusion**

386 Our approach for stenosis estimation showed promising results, outperforming previous  
387 work on predicting visual assessments. However, a significant performance drop was  
388 observed in the external test cohort, which had suspected stenosis detected by CTA.  
389 Predicting hemodynamically significant stenosis measured by FFR using the stenosis  
390 estimation models did not surpass using visual assessments as predictors, indicating that  
391 improvements in this area are likely needed. Notably, the stenosis estimations were better  
392 at predicting QCA diameter stenosis compared to visual assessments. These results suggest  
393 that our approach for stenosis estimation is clinically relevant, offering a faster and more  
394 objective alternative to traditional methods. Future research should focus on improving the

395 models and investigating the effect of the estimated values on the treatment compared  
396 with traditional methods.

### 397 **Clinical perspectives**

398 A deep learning-based approach can estimate the degree of stenosis directly using cine  
399 loops. The model is the first of its kind to predict stenosis in all 16 coronary artery segments.  
400 The deep learning model demonstrated strong performance in predicting visual assessment  
401 of stenosis, and the model was better than traditional visual assessment in predicting  
402 stenosis measured. The model offers a fast and accurate alternative to QCA. However,  
403 further improvements are necessary to enhance its ability to determine hemodynamical  
404 significant stenosis.

405

### 406 **Acknowledgements**

407 This work was funded by the Novo Nordisk Foundation (NNF17OC0027594 and  
408 NNF14CC0001) and the Innovation Fund Denmark (518-00102B).

### 409 **Competing interests**

410 Søren Brunak has ownership in Intomics A/S, Hoba Therapeutics Aps, Novo Nordisk A/S,  
411 Lundbeck A/S, Eli Lilly & Co and ALK Abello and has managing board memberships in  
412 Proscion A/S and Intomics A/S. Morten Bøttcher declares advisory board work for Astra  
413 Zeneca, Novo Nordisk A/S, Sanofi, Bayer, Pfizer/BMS, Acarix, Boehringer Ingelheim and  
414 Novartis. The remaining authors declare no conflicts of interests.

### 415 **References**

- 416 1. Jiangping, S. *et al.* Assessment of coronary artery stenosis by coronary angiography: a  
417 head-to-head comparison with pathological coronary artery anatomy. *Circulation:*  
418 *Cardiovascular Interventions* **6**, 262-268;  
419 <https://doi.org/10.1161/CIRCINTERVENTIONS.112.000205> (2013).
- 420 2. Neumann, F. J. *et al.* ESC/EACTS Guidelines on Myocardial Revascularization. *European*  
421 *Heart Journal* **40**, 87-165; <http://doi.org/10.1093/eurheartj/ehy394> (2018).
- 422 3. Leape, L. L. *et al.* Effect of variability in the interpretation of coronary angiograms on the  
423 appropriateness of use of coronary revascularization procedures. *American Heart Journal*  
424 **139**, 106-113; [http://doi.org/10.1016/s0002-8703\(00\)90316-8](http://doi.org/10.1016/s0002-8703(00)90316-8) (2000).
- 425 4. Lee, J. M. *et al.* Intravascular Imaging-Guided or Angiography-Guided Complex PCI *N Engl J*  
426 *Med.* **388**, 1668-1679; <http://doi.org/10.1056/NEJMoa2216607> (2023).
- 427 5. Hwang, D., Lee, J. M., & Koo, B. K. Physiologic Assessment of Coronary Artery Disease:  
428 Focus on Fractional Flow Reserve. *Korean Journal of Radiology* **17**, 307-320;  
429 <http://doi.org/10.3348/kjr.2016.17.3.307> (2016).
- 430 6. Pijls, N. H. Optimum guidance of complex PCI by coronary pressure measurement. *Heart*  
431 **90**, 1085-1093; <http://doi.org/10.1136/hrt.2003.032151> (2004).
- 432 7. Tonino, P. A. *et al.* Fractional Flow Reserve versus Angiography for Guiding Percutaneous  
433 Coronary Intervention. *New England Journal of Medicine* **360**, 213-224;  
434 <http://doi.org/10.1056/NEJMoa0807611> (2009).
- 435 8. Zimmermann, F. M. *et al.* Fractional flow reserve-guided percutaneous coronary  
436 intervention vs. medical therapy for patients with stable coronary lesions: meta-analysis of

- 437 individual patient data. *European Heart Journal* **40**, 180-186
- 438 <http://doi.org/10.1093/eurheartj/ehy812> (2019).
- 439 9. De Bruyne, B. *et al.* Fractional flow reserve–guided PCI versus medical therapy in stable  
440 coronary disease. *New England Journal of Medicine* **367**, 991-1001  
441 <http://doi.org/10.1056/NEJMoa1205361> (2012).
- 442 10. Wong, C. C. *et al.* A real-world comparison of outcomes between fractional flow reserve-  
443 guided versus angiography-guided percutaneous coronary intervention. *PloS ONE* **16**,  
444 e0259662; <https://doi.org/10.1371/journal.pone.0259662> (2021).
- 445 11. Härle, T. *et al.* Real-world use of fractional flow reserve in Germany: results of the  
446 prospective ALKK coronary angiography and PCI registry. *Clinical Research in Cardiology* **106**,  
447 140-150; <http://doi.org/10.1007/s00392-016-1034-5> (2017).
- 448 12. Gudnason, T. *et al.* Comparison of interventional cardiology in two European countries: a  
449 nationwide Internet based registry study. *International Journal of Cardiology* **168**, 1237-  
450 1242; <http://doi.org/10.1016/j.ijcard.2012.11.054> (2013).
- 451 13. Parikh RV, Liu G, Plomondon ME, Sehested TS, Hlatky MA, Waldo SW, Fearon WF.  
452 Utilization and outcomes of measuring fractional flow reserve in patients with stable  
453 ischemic heart disease. *Journal of the American College of Cardiology* **75**, 409-419;  
454 <https://doi.org/10.1016/j.jacc.2019.10.060> (2020).
- 455 14. Collet, C. *et al.* State of the art: coronary angiography. *EuroIntervention* **13**, 634-643  
456 (2017).

- 457 15. Sheth, T. *et al.* Nonculprit lesion severity and outcome of revascularization in patients  
458 with STEMI and multivessel coronary disease. *Journal of the American College of Cardiology*  
459 **76**, 1277-1286 (2020).
- 460 16. Moon, J. H. *et al.* Automatic stenosis recognition from coronary angiography using  
461 convolutional neural networks. *Computer Methods and Programs in Biomedicine* **198**,  
462 105819: <http://doi.org/10.1016/j.cmpb.2020.105819> (2021).
- 463 17. Danilov, V. V. *et al.* Real-time coronary artery stenosis detection based on modern  
464 neural networks. *Scientific Reports* **11**, 7582; <http://doi.org/10.1038/s41598-021-87174-2>  
465 (2021).
- 466 18. Roguin, A., *et al.* Early Feasibility of Automated Artificial Intelligence Angiography Based  
467 Fractional Flow Reserve Estimation. *The American Journal of Cardiology* **139**, 8-14;  
468 <http://doi.org/10.1016/j.amjcard.2020.10.022> (2021).
- 469 19. Avram, R. *et al.* Fully automated coronary angiography interpretation and stenosis  
470 detection using a deep learning-based algorithmic pipeline. *Journal of the American College*  
471 *of Cardiology* **77**, 3244; <https://doi.org/10.4244/eij-d-20-00570> (2021).
- 472 20. Du, T. *et al.* Training and validation of a deep learning architecture for the automatic  
473 analysis of coronary angiography. *EuroIntervention* **17**, 32-40; [https://doi.org/10.4244/eij-d-](https://doi.org/10.4244/eij-d-20-00570)  
474 [20-00570](https://doi.org/10.4244/eij-d-20-00570) (2021).
- 475 21. Popov, M. *et al.* Dataset for Automatic Region-based Coronary Artery Disease  
476 Diagnostics Using X-Ray Angiography Images. *Scientific Data* **11**, 20 (2024).

- 477 22. Kim, Y. I., *et al.* Artificial intelligence-based quantitative coronary angiography of major  
478 vessels using deep-learning. *International Journal of Cardiology* **405**, 131945;  
479 <https://doi.org/10.1016/j.ijcard.2024.131945> (2024).
- 480 23. Langlais É. L., *et al.* Evaluation of stenoses using AI video models applied to coronary  
481 angiography. *npj Digital Medicine* **7**, 138 (2024).
- 482 24. Patrini, G., Rozza, A., Menon, A. K., Nock, R., & Qu, L. Making deep neural networks  
483 robust to label noise: A loss correction approach in *Proceedings of the IEEE conference on*  
484 *computer vision and pattern recognition 1944-1952* (2017).
- 485 25. Sianos, G., *et al.* The SYNTAX Score: an angiographic tool grading the complexity of  
486 coronary artery disease. *EuroIntervention* **1**, 219-227 (2005).
- 487 26. Neglia, D., *et al.* Detection of significant coronary artery disease by noninvasive  
488 anatomical and functional imaging. *Circulation: Cardiovascular Imaging* **8**, e002179;  
489 <http://doi.org/10.1161/CIRCIMAGING.114.002179> (2015).
- 490 27. Austen, W. G., *et al.* A reporting system on patients evaluated for coronary artery  
491 disease. Report of the Ad Hoc Committee for Grading of Coronary Artery Disease, Council on  
492 Cardiovascular Surgery, American Heart Association. *Circulation* **51**, 5-40;  
493 <https://doi.org/10.1161/01.CIR.51.4.5> (1975).
- 494 28. Eschen, C. K., *et al.* Classification of Left and Right Coronary Arteries in Coronary  
495 Angiographies Using Deep Learning. *Electronics* **11**, 2087  
496 <https://doi.org/10.3390/electronics11132087> (2022).
- 497 29. Tran, D., *et al.* A Closer Look at Spatiotemporal Convolutions for Action Recognition in  
498 *Proceedings of the IEEE conference on Computer Vision and Pattern Recognition*

- 499 6450-6459; <https://doi.org/10.1109/CVPR.2018.00675> (2018).
- 500 30. Cardoso M.J, *et al.* Monai: An open-source framework for deep learning in healthcare.  
501 arXiv preprint arXiv; <http://dx.doi.org/10.48550/arXiv.2211.02701> (2022)
- 502 31. Lin T.Y., Goyal P, Girshick R, He K, Dollár P. Focal loss for dense object detection. *In*  
503 *Proceedings of the IEEE international conference on computer vision* 2980-2988;  
504 <https://doi.org/10.1109/ICCV.2017.324> (2017)
- 505 32. Yang Y, Zha K, Chen Y, Wang H, Katabi D. Delving into deep imbalanced regression.  
506 *International Conference on Machine Learning* 11842-11851;  
507 <https://doi.org/10.48550/arXiv.2102.09554> (2021)
- 508 33. Carreira J, Zisserman A. Quo vadis, action recognition? a new model and the kinetics  
509 dataset. *Proceedings of the IEEE Conference on Computer Vision and Pattern Recognition*,  
510 6299-
- 511
- 512
- 513
- 514
